# Supplementary material for: Contrasting Leaf Trait Responses of Conifer and Broadleaved Seedlings to Altered Resource Availability Are Linked to Resource Strategies
Source: PubMed Central journal article supplement (PMC7285355; doi:10.3390/plants9050621), 2020-05-13
Supplement: plants-09-00621-s001.pdf [file plants-09-00621-s001.pdf]

**Supplementary Material**

**Table S1.** Seed material used in the common garden experiment.

| <b>Species</b>                                        | <b>Provenance</b>       | <b>Latitude<br/>(°N)</b> | <b>Longitude<br/>(°E)</b> | <b>Elevation<br/>(m a.s.l.)</b> | <b>Year of seed<br/>collection</b> |
|-------------------------------------------------------|-------------------------|--------------------------|---------------------------|---------------------------------|------------------------------------|
| <b>Evergreen conifers</b>                             |                         |                          |                           |                                 |                                    |
| <i>Abies alba</i>                                     | Leuk, Switzerland       | 46.33                    | 7.64                      | 1250                            | 2015                               |
| <i>Picea abies</i>                                    | Bremgarten, Switzerland | 47.36                    | 8.31                      | 425                             | 2015                               |
| <i>Pinus sylvestris</i>                               | Leuk, Switzerland       | 46.31                    | 7.61                      | 630                             | 2016                               |
| <i>Pseudotsuga menziesii</i><br><i>var. menziesii</i> | Washington, USA         | 46.76                    | -122.06                   | 435                             | 2013                               |
| <b>Deciduous broadleaves</b>                          |                         |                          |                           |                                 |                                    |
| <i>Acer pseudoplatanus</i>                            | Arni, Switzerland       | 47.31                    | 8.43                      | 575                             | 2014                               |
| <i>Fagus sylvatica</i>                                | Hausen, Switzerland     | 47.23                    | 8.57                      | 705                             | 2014                               |
| <i>Quercus petraea</i>                                | Erlach, Switzerland     | 47.03                    | 7.09                      | 380                             | 2015                               |
| <i>Quercus robur</i>                                  | Aristau, Switzerland    | 47.30                    | 8.38                      | 453                             | 2015                               |

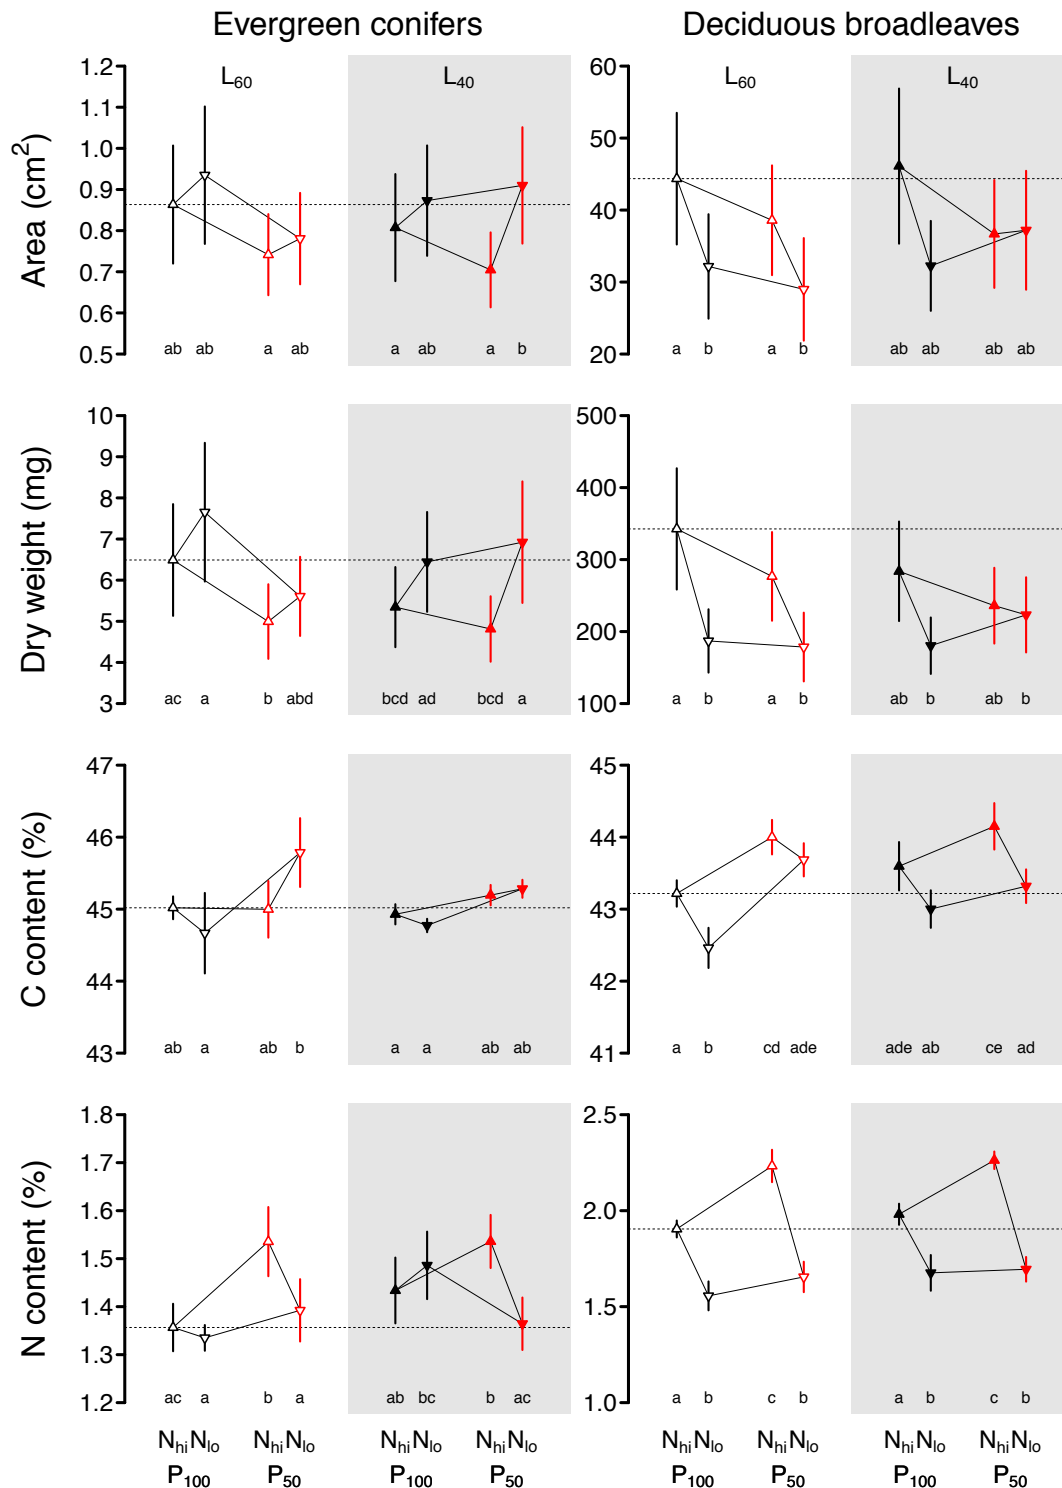

**Figure S1.** Area, dry weight, C and N content (means  $\pm$  SE) of the foliage of evergreen conifer and deciduous broadleaved seedlings grown for three years under fully crossed combinations of ambient ( $P_{100}$ , black symbols) or reduced ( $P_{50}$ , red symbols) precipitation, high ( $L_{60}$ , open symbols) or low ( $L_{40}$ , filled symbols) PAR, and high ( $N_{hi}$ , upwards triangle) or low ( $N_{lo}$ , downwards triangle) soil nutrient availability. The dashed line indicates foliar traits under optimal resource availability, i.e.  $L_{60} \times P_{100} \times N_{hi}$ . Different letters below the means indicate significant differences between treatment combinations within species group (Tukey adjusted least square means).

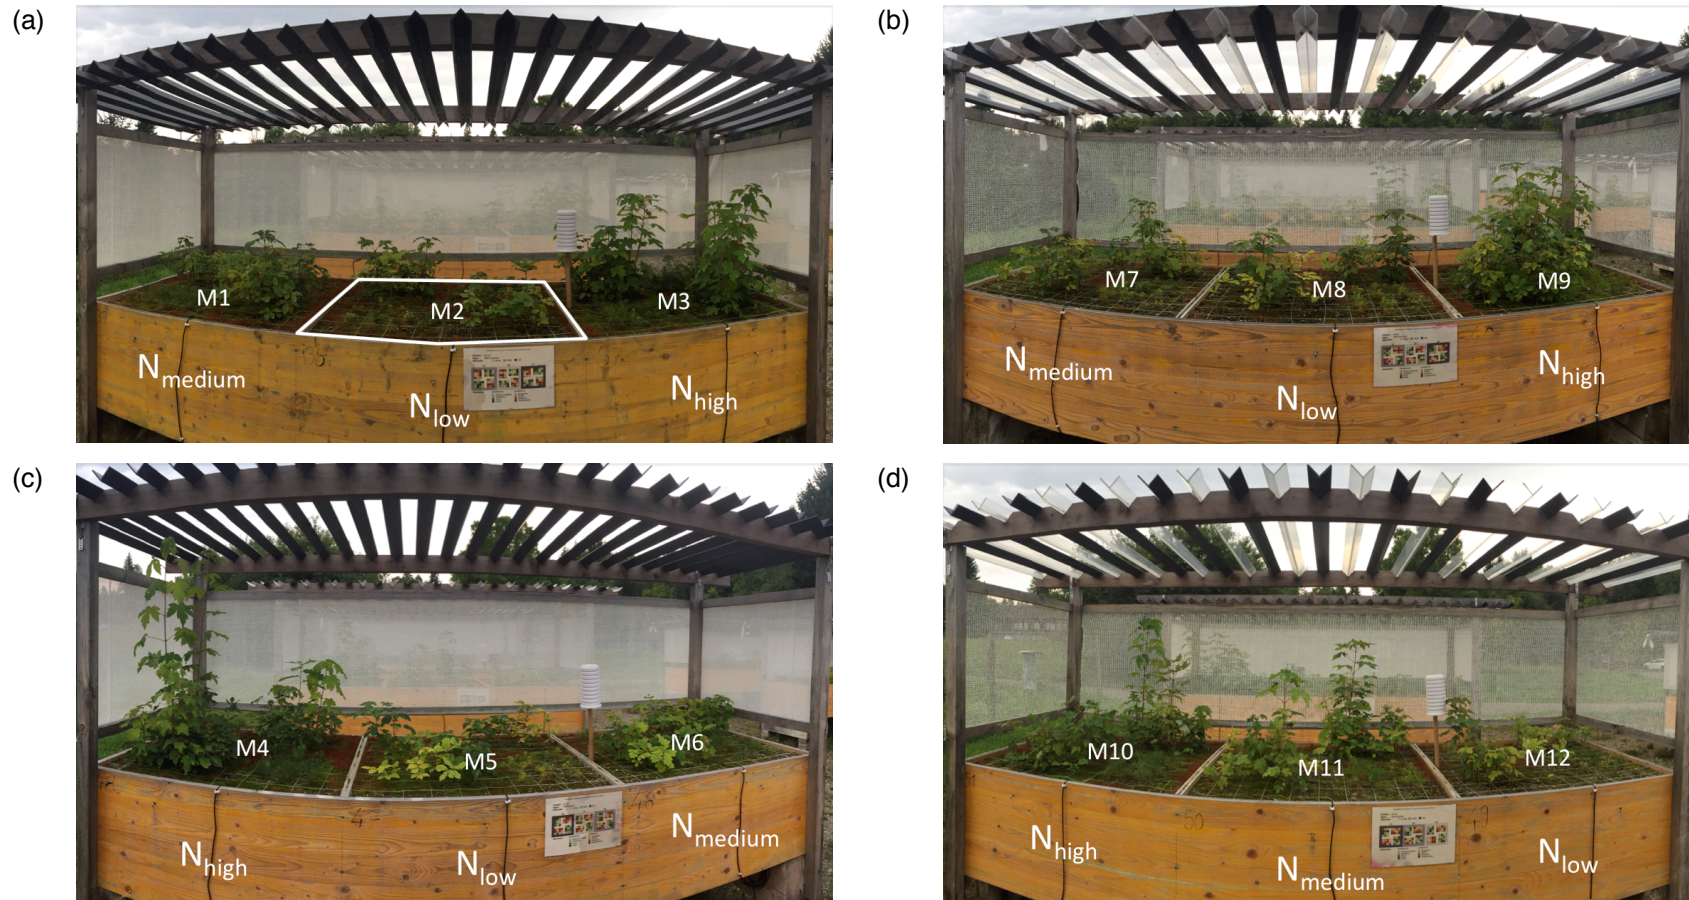

**Figure S2.** The experimental set-up consisted of 36 mesocosms (M1–M12) of 1 m x 1 m x 0.5 m arranged in sets of three. In order to manipulate water availability, each triplet was covered either with (a,b) a roof that allowed 100% precipitation throughfall ( $P_{100}$ : V-shaped plastic channels mounted downwards; M1–M3, M7–M8), or (c,d) a roof that removed 50% of the ambient precipitation ( $P_{50}$ : V-shaped channels that cover 50% of the mesocosm surface; M4–M6, M10–12). Light conditions were manipulated with the colouring of the channels (either all or 50% of the channels covered with black plastic foil impenetrable to light) combined with shade cloth of varying mesh size attached to the east, south and west of each mesocosm-triplet: (a,c) medium shade corresponding to  $38.8 \pm 0.021$  % (mean  $\pm$  SE) of photosynthetically active radiation (PAR;  $L_{40}$ ); (b,d) light shade with  $58.0 \pm 0.022$  % PAR. Different amounts of nutrients were added twice a year to the three mesocosms in a triplet ( $N_{low}$ ,  $N_{medium}$ ,  $N_{high}$ ). Leaf traits were only studied in the  $N_{low}$  and  $N_{high}$  mesocosms.
